# Supplementary material for: Brownian motor inspired monodirectional continuous spinning triboelectric nanogenerators for extracting energy from irregular gentle water waves
Source: Royal Society of Chemistry journal article supplement (doi:10.1039/d2ee03395j), 2022-11-23
Supplement: d2ee03395j1.pdf [file d2ee03395j1.pdf]

## Electronic Supplementary Information

# **Brownian motor inspired monodirectional continuous spinning triboelectric nanogenerators for extracting energy from irregular gentle water waves**

Huijing Qiu,<sup>‡ac</sup> Huamei Wang,<sup>‡ab</sup> Liang Xu,<sup>\*abc</sup> Mingli Zheng,<sup>ab</sup> Zhong Lin Wang,<sup>\*acd</sup>

<sup>a</sup> Beijing Institute of Nanoenergy and Nanosystems, Chinese Academy of Sciences, Beijing, 101400, P. R. China. E-mail: [xuliang@binn.cas.cn](mailto:xuliang@binn.cas.cn)

<sup>b</sup> School of Nanoscience and Technology, University of Chinese Academy of Sciences, Beijing, 100049, P. R. China.

<sup>c</sup> Center on Nanoenergy Research, School of Physical Science and Technology, Guangxi University, Nanning, 530004, P. R. China.

<sup>d</sup> Georgia Institute of Technology, Atlanta, Georgia, 30332-0245, USA. E-mail: [zlwang@gatech.edu](mailto:zlwang@gatech.edu)

<sup>‡</sup> H. Qiu and H. Wang contributed equally to this work.

## **Content**

### **Supplementary Figures:**

Fig. S1. Schematic illustration of the chiral linkage.

Fig. S2. Detailed structure of the one-way bearing.

Fig. S3. Open-circuit voltage of the sub-unit under a motor speed of 50 rpm.

Fig. S4. Transferred charges of the sub-unit under different motor speeds.

Fig. S5. Basic configuration for the second excitation mode.

Fig. S6. Short-circuit current curve of the sub-unit after a single excitation with 4 mm spacers.

Fig. S7. Duration time of the sub-unit after a single excitation with different spacer thicknesses.

Fig. S8. Integrated charges of the sub-unit after a single excitation with different spacer thicknesses.

Fig. S9. Open-circuit voltage of the sub-unit under successive excitations.

Fig. S10. Peak currents and load voltages of the CS-TENG with various loads in air.

Fig. S11. Rectified short-circuit current curve of the CS-TENG in water.

### **Supplementary Movies:**

Movie S1 Continuous spinning for 20 s.

Movie S2 Continuous spinning under ultra-low frequency excitations.

Movie S3 The CS-TENG excited by water waves.

Movie S4 348 LEDs are constantly lighted up by the CS-TENG.

Movie S5 Continuous self-powered temperature sensing based on the CS-TENG.

Movie S6 Self-powered wind speed sensing based on the CS-TENG.

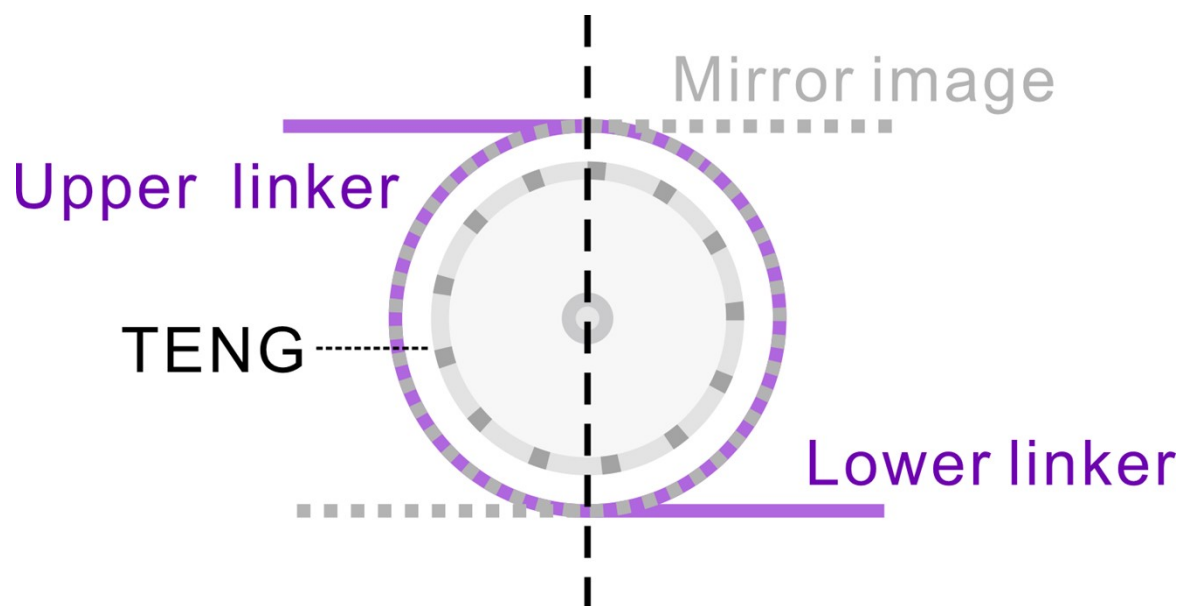

**Fig. S1.** Schematic illustration of the chiral linkage.

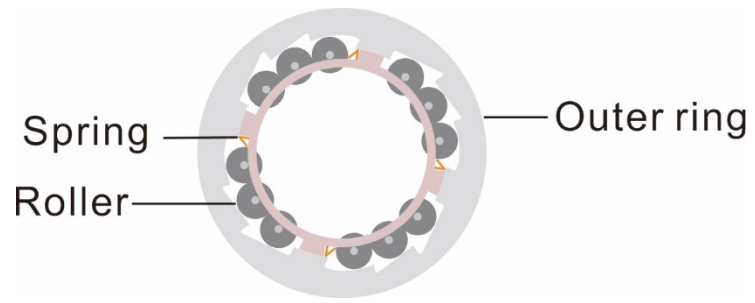

**Fig. S2.** Detailed structure of the one-way bearing.

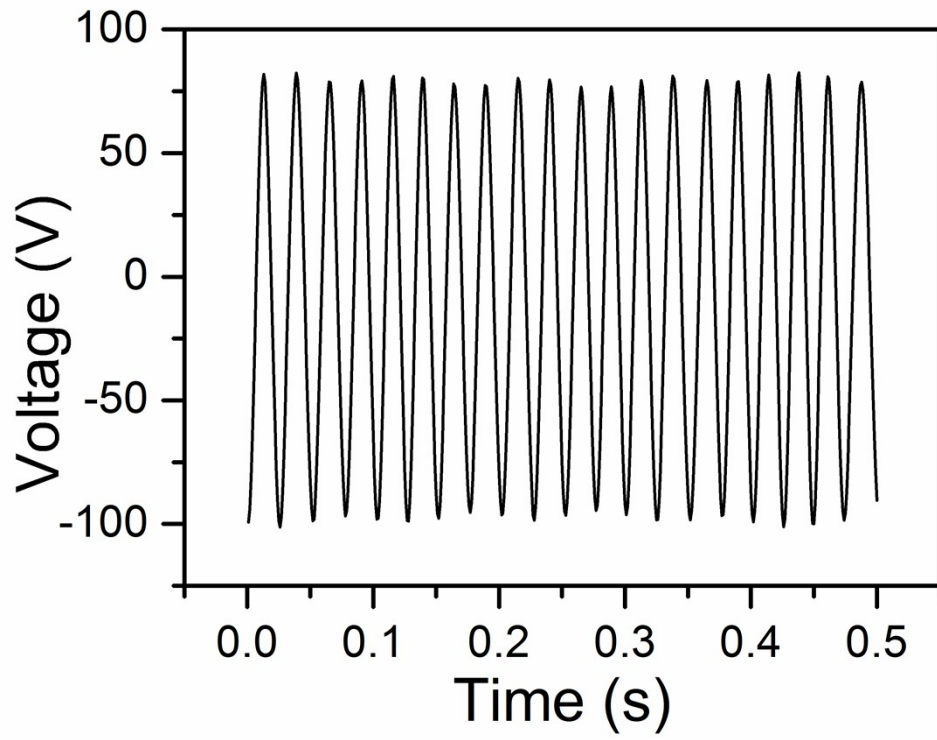

**Fig. S3.** Open-circuit voltage of the sub-unit under a motor speed of 50 rpm.

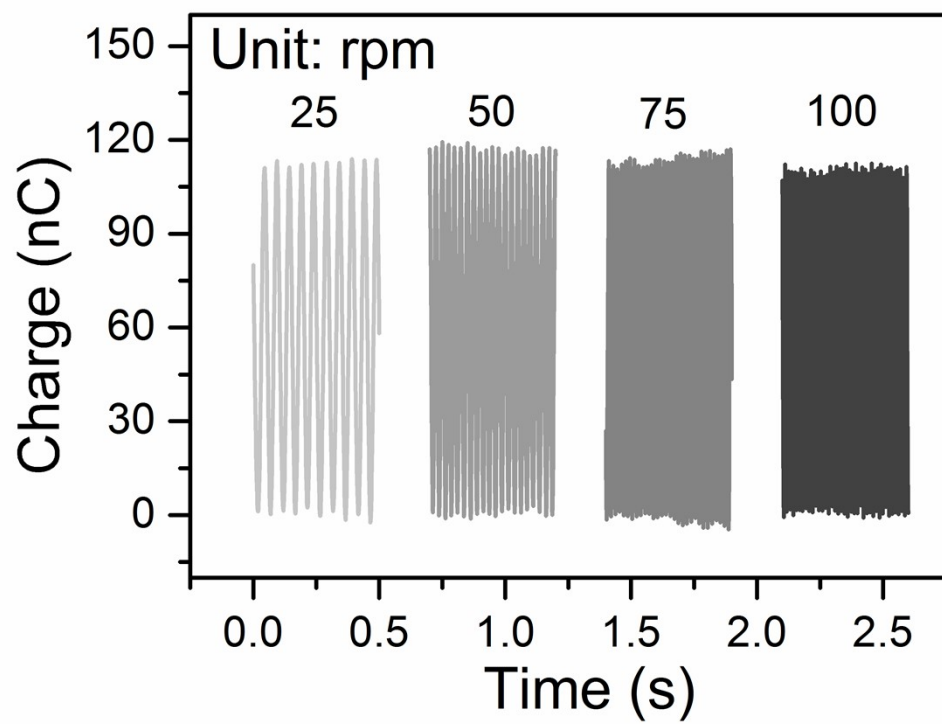

**Fig. S4.** Transferred charges of the sub-unit under different motor speeds.

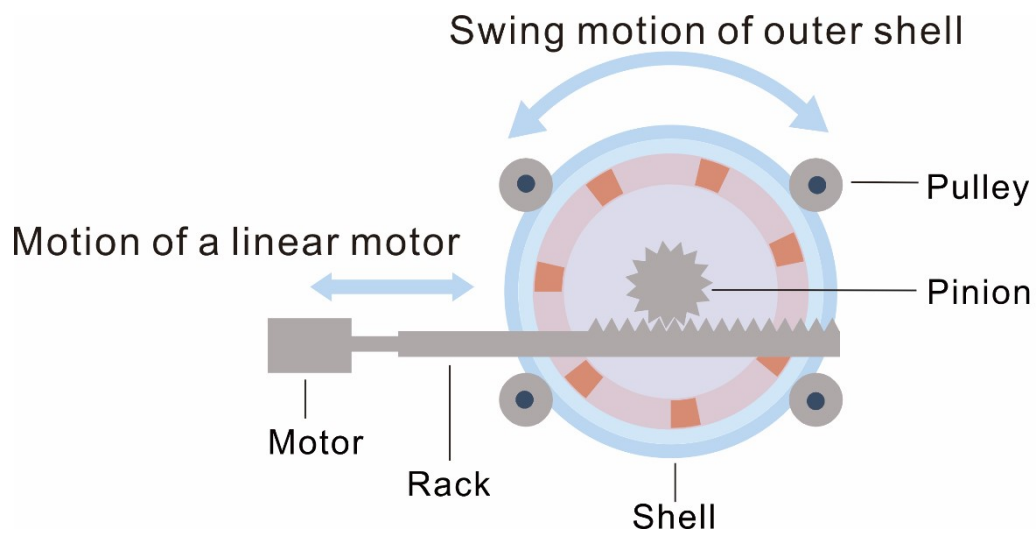

**Fig. S5.** Basic configuration for the second excitation mode.

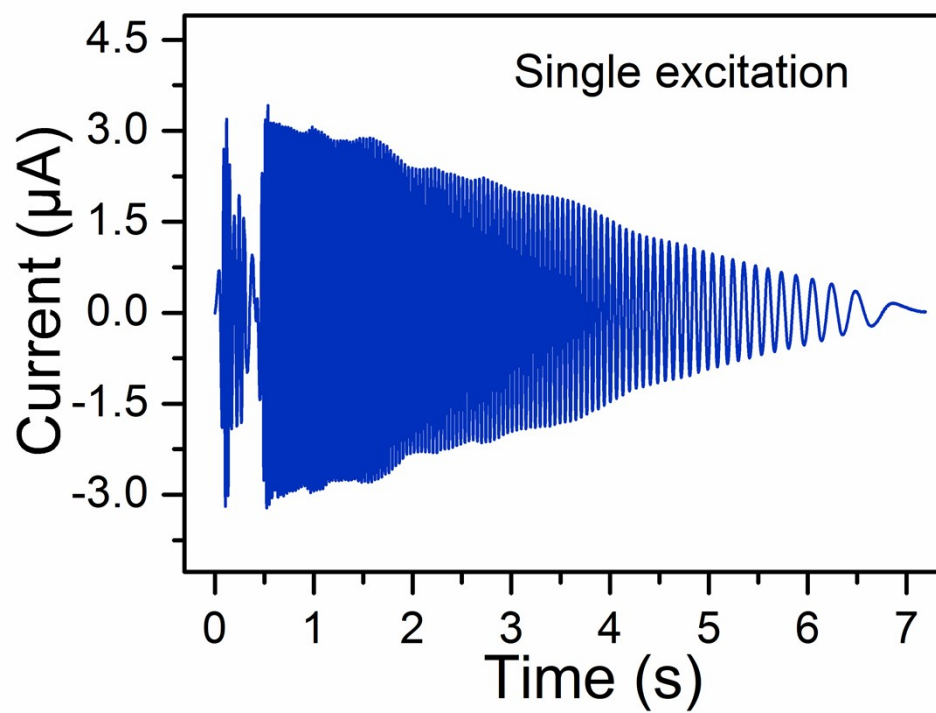

**Fig. S6.** Short-circuit current curve of the sub-unit after a single excitation with 4 mm spacers.



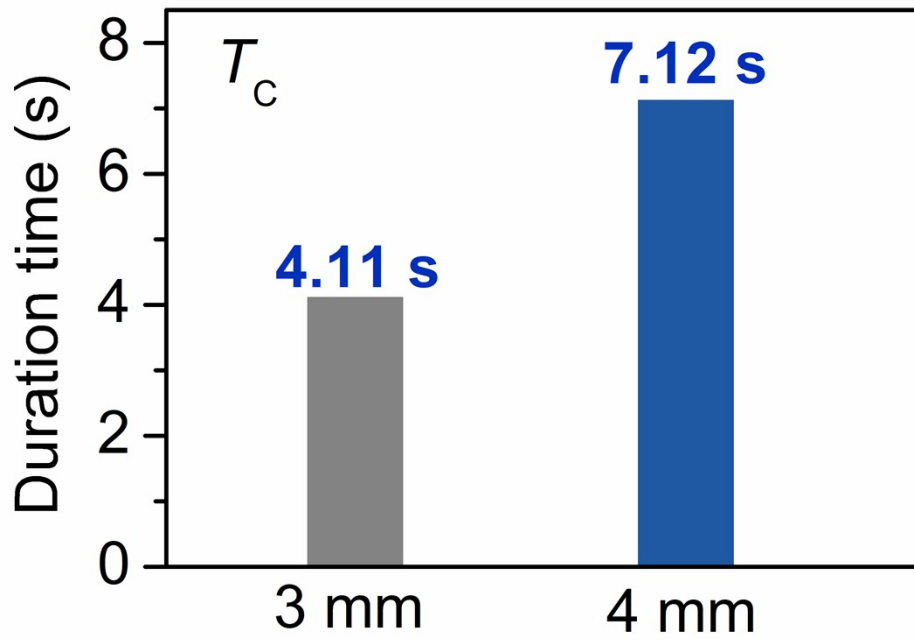

**Fig. S7.** Duration time of the sub-unit after a single excitation with different spacer thicknesses.

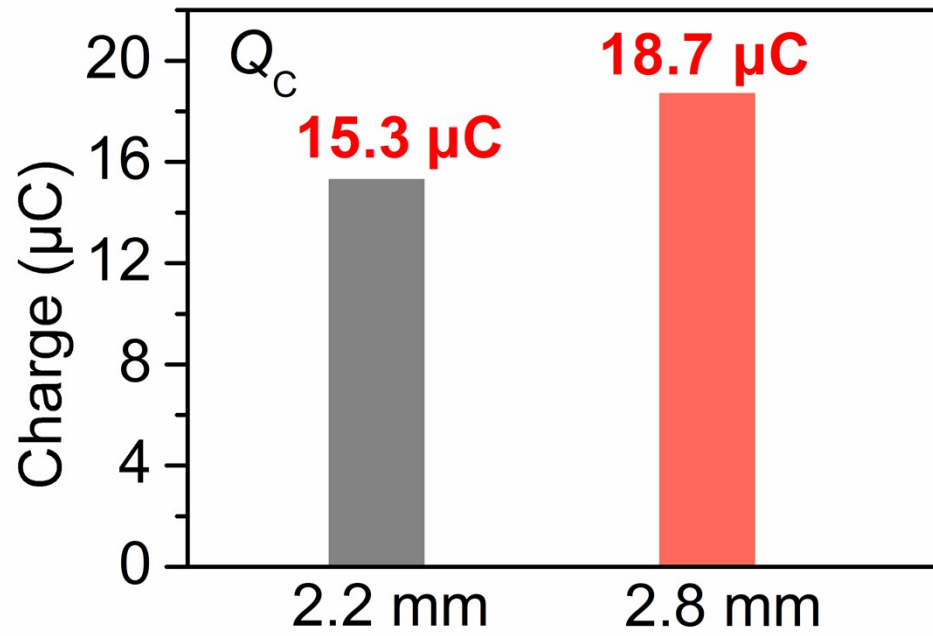

**Fig. S8.** Integrated charges of the sub-unit after a single excitation with different spacer thicknesses.

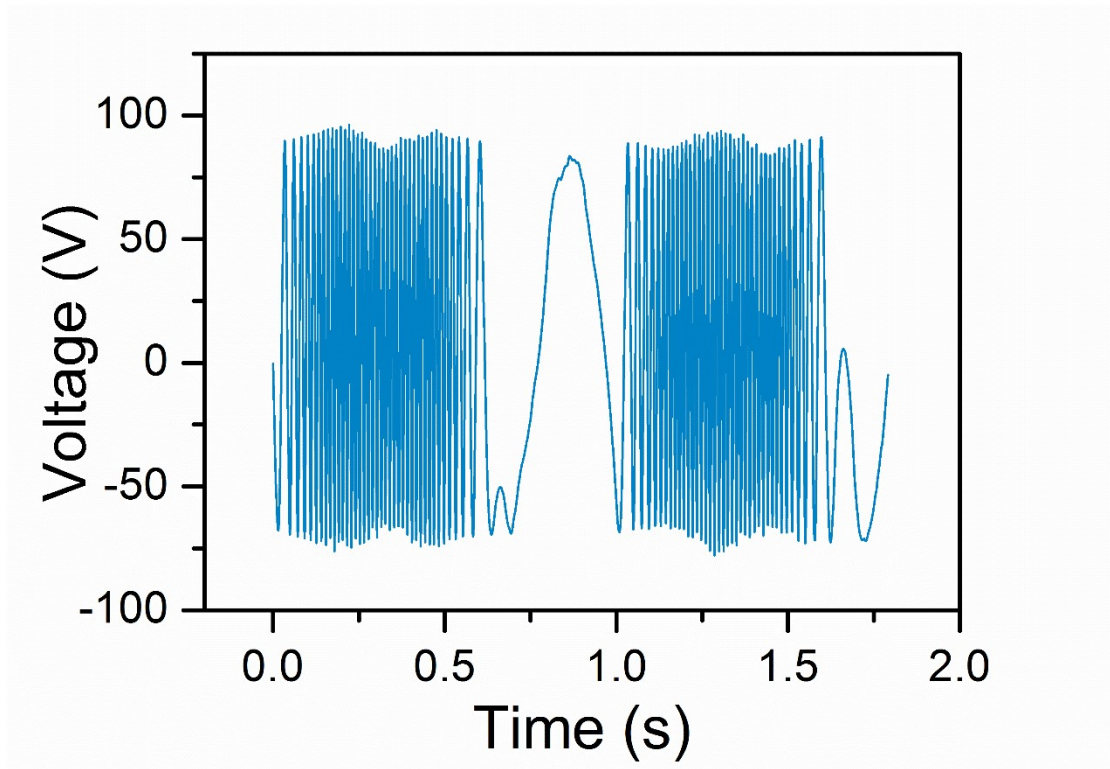

**Fig. S9.** Open-circuit voltage of the sub-unit under successive excitations.

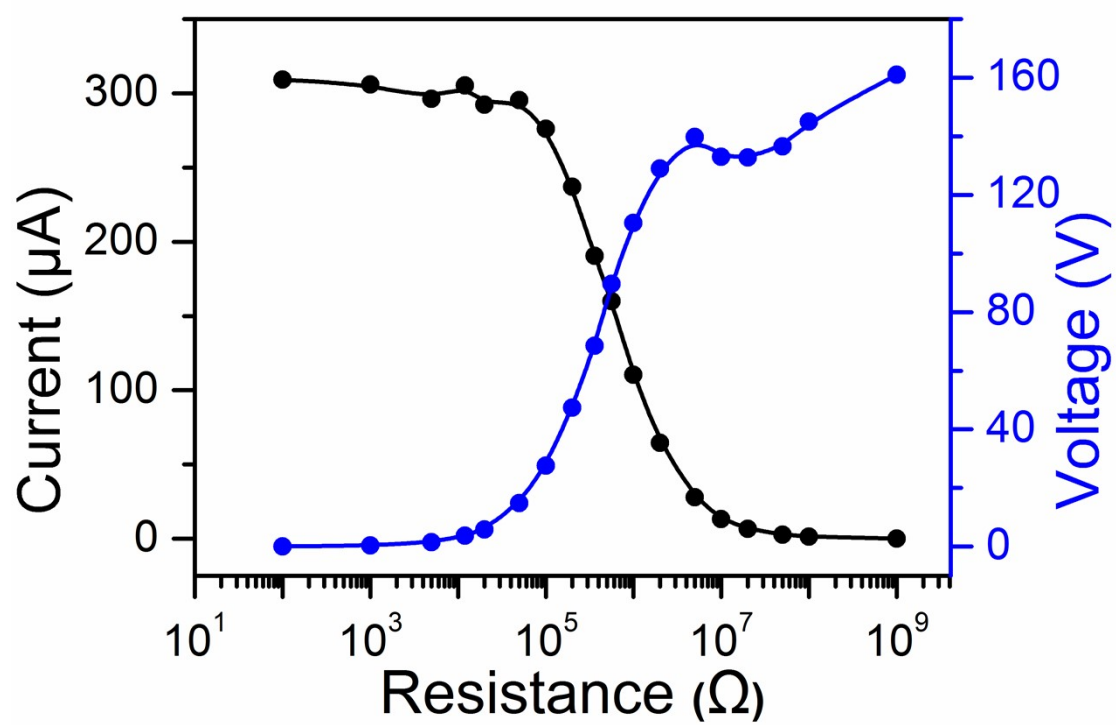

**Fig. S10.** Peak currents and load voltages of the CS-TENG with various loads in air.

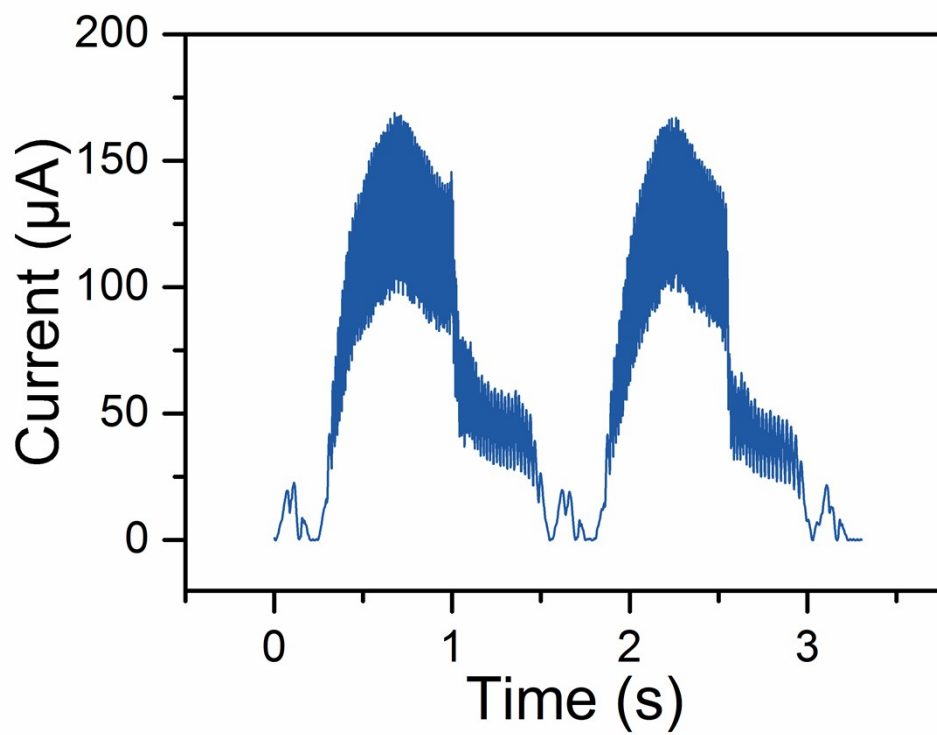

**Fig. S11.** Rectified short-circuit current curve of the CS-TENG in water.
